# Supplementary material for: Preparation of highly dispersed Pt–Sn/Al2O3 catalysts via supercritical fluid deposition and their catalytic performance
Source: Royal Society of Chemistry journal article supplement (doi:10.1039/d1nj00108f), 2021-01-01
Supplement: d1nj00108f1.pdf [file d1nj00108f1.pdf]

## Electronic Supplementary Information for New Journal of Chemistry

### Supplementary Information for

### Preparation of Highly Dispersed Pt-Sn/Al<sub>2</sub>O<sub>3</sub> Catalysts via Supercritical Fluid

### Deposition and its Catalytic Performance

Haoxi Jiang<sup>a,b</sup>, Guangshen Li<sup>a,b</sup>, Jing Wang<sup>a,b</sup>, Sheng Wang<sup>a,b</sup>

<sup>a</sup> Key Laboratory for Green Chemical Technology of Ministry of Education, School of Chemical Engineering and Technology,

Tianjin University, Tianjin 300072, China

<sup>b</sup> Collaborative Innovation Center of Chemical Science and Engineering, Tianjin 300072, China

# 1. oxyhydrogen titration of different precursor salts prepared catalysts

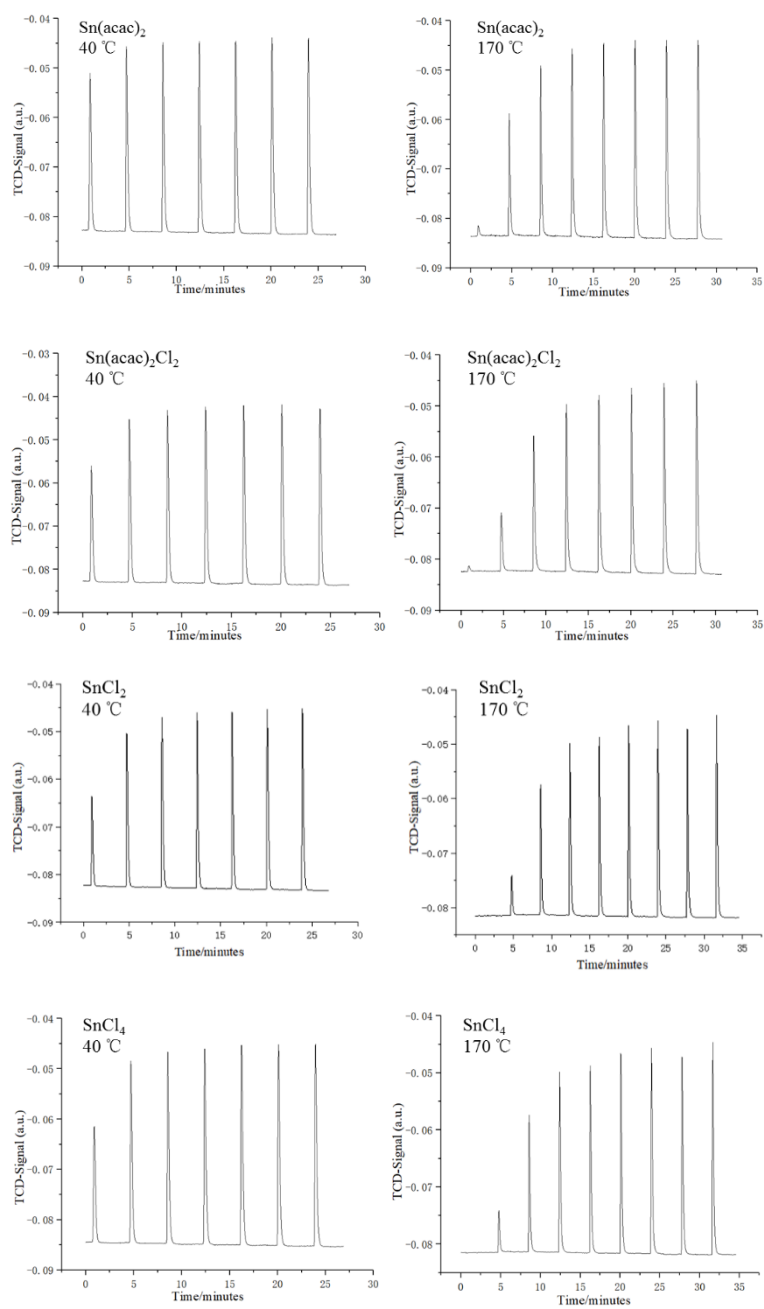

Fig.S1 hydrogen-oxygen pulse titration curves of Pt-Sn/Al<sub>2</sub>O<sub>3</sub> catalyst samples prepared by four Sn precursors

## 2. oxyhydrogen titration of catalysts with different Sn/Pt ratios

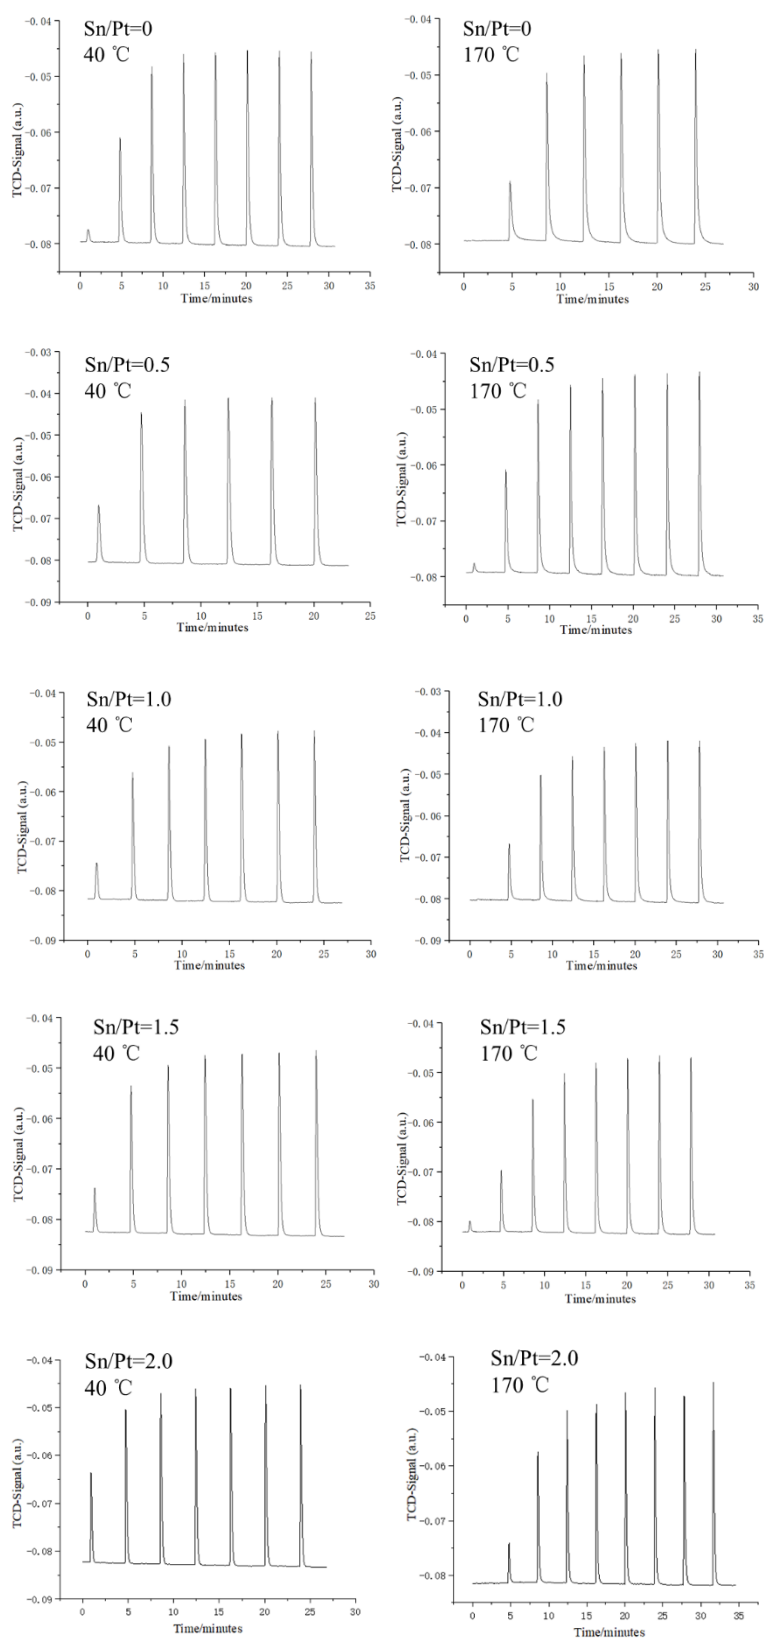

Fig. S2 hydrogen-oxygen pulse titration curves of Pt-Sn/Al<sub>2</sub>O<sub>3</sub> catalyst samples prepared by different Sn/Pt ratios
